# Supplementary material for: Synergism in Antiplasmodial Activities of Artemether and Lumefantrine in Combination with Securidaca longipedunculata Fresen (Polygalaceae)
Source: MDPI journal article supplement (doi:10.3390/plants11010047), 2021-12-24
Supplement: s1 [file s1]

## SELECTED ANTIPLASMODIAL ACTIVITY DOSE RESPONSE CURVES

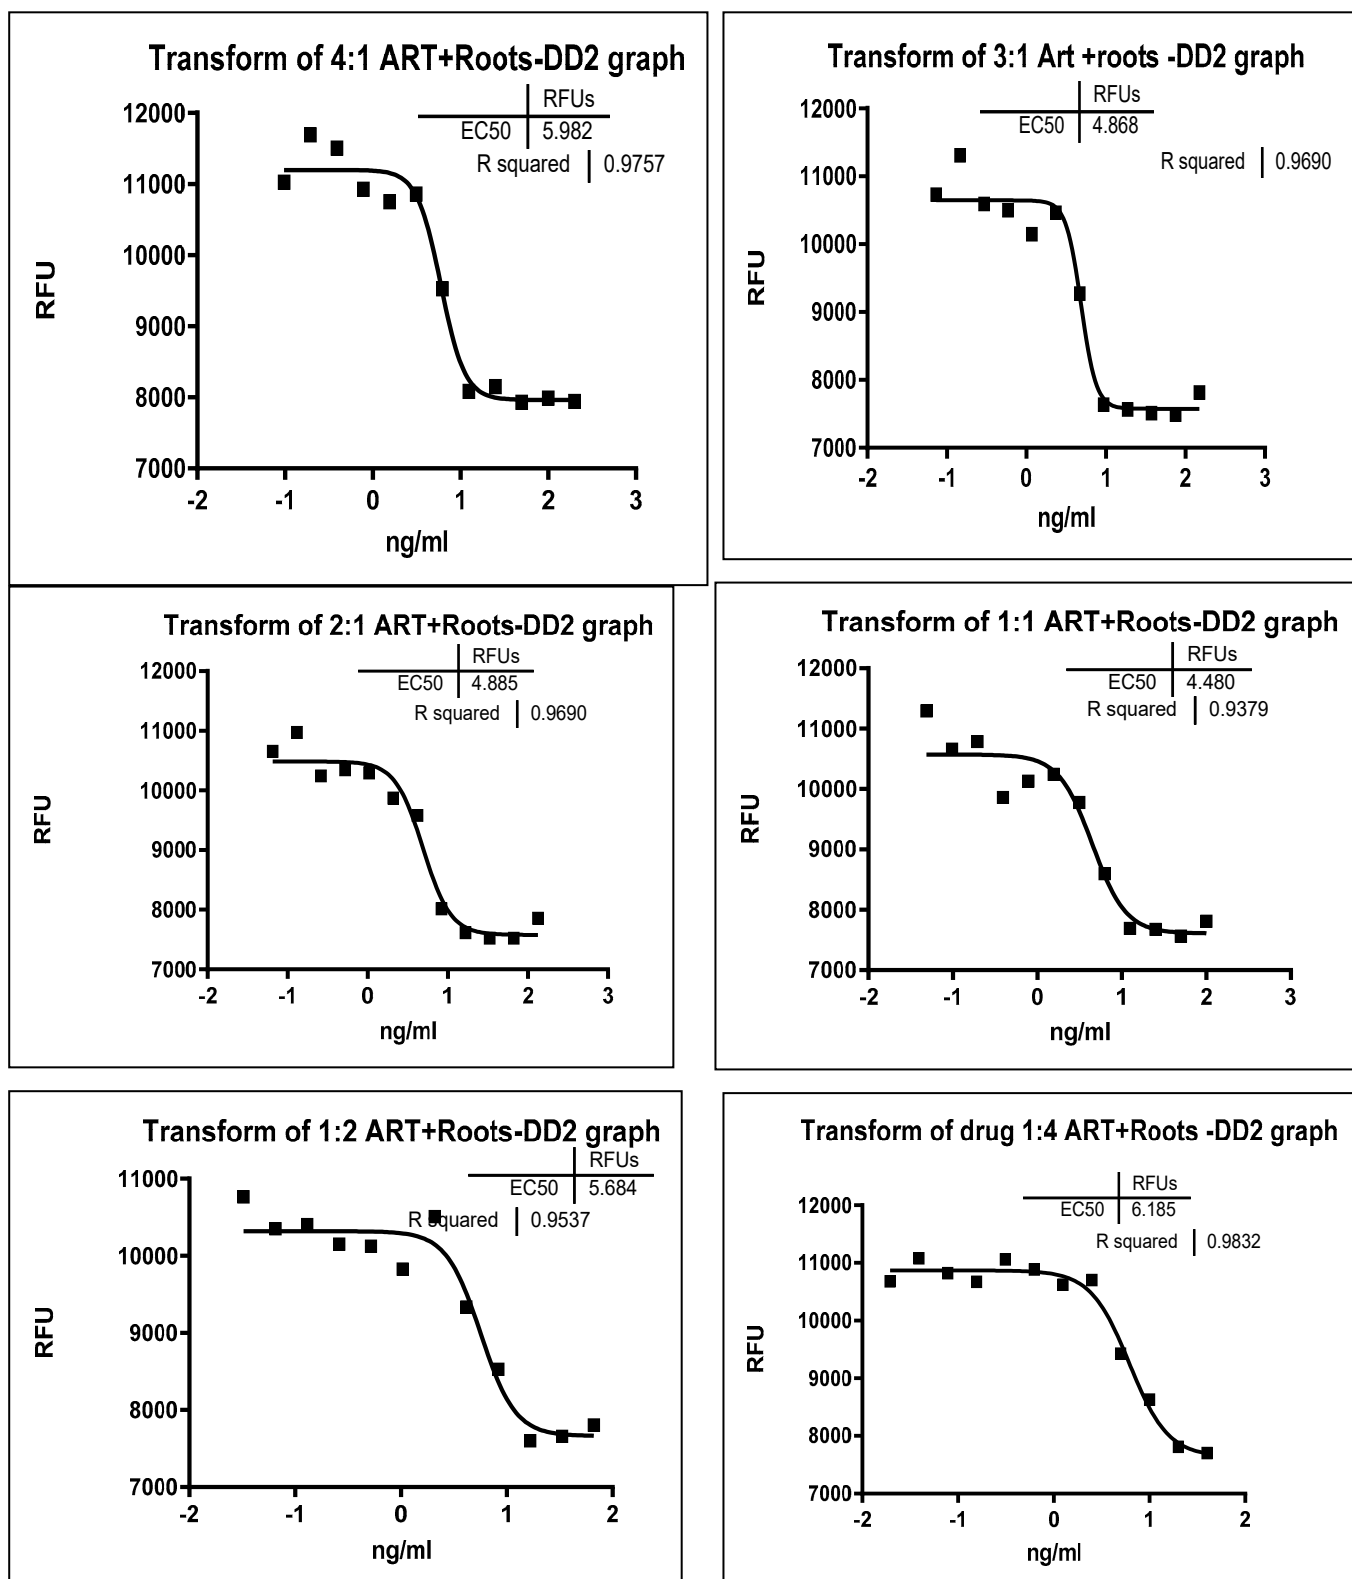

**Figure S1:** Antiplasmodial activity dose response curves of Artemether combined with roots extract of *S. longipedunculata* against DD2 *P. falciparum* strain.

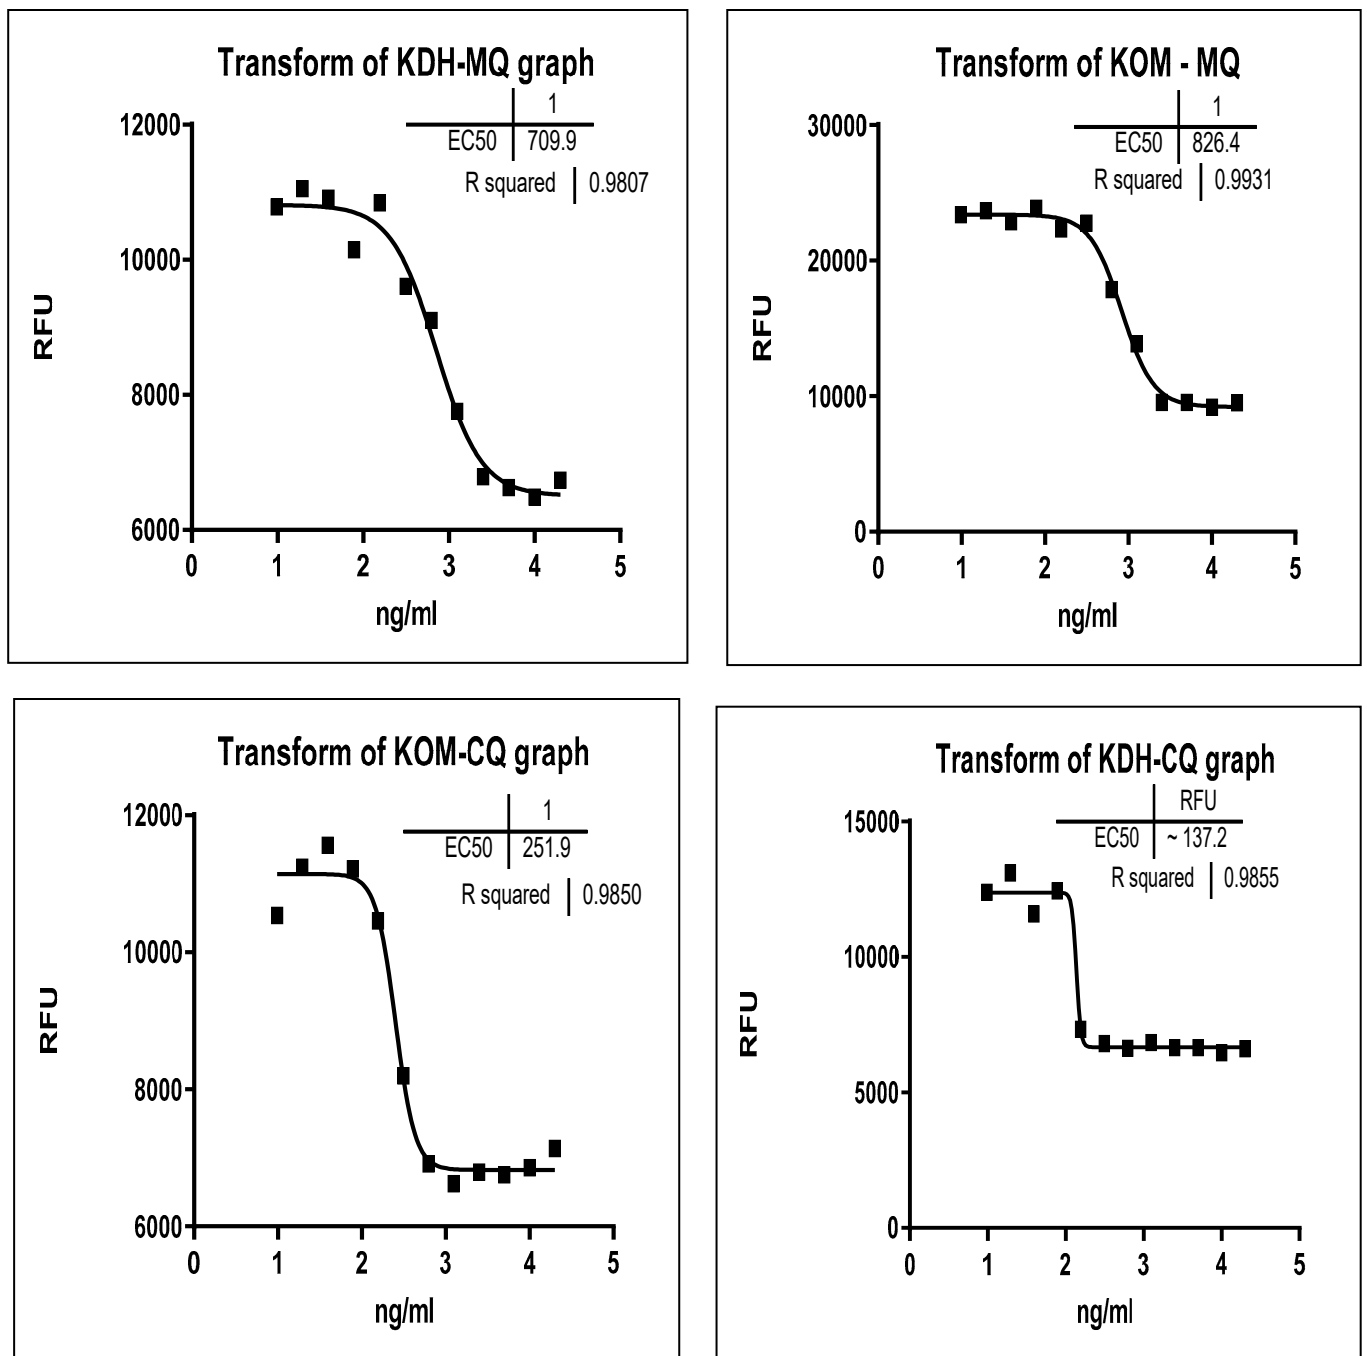

**Figure S2:** Antiplasmodial activity dose response curves of Mefloquine (MQ) against field isolates *ex vivo* collected from Kisumu County and Kombewa hospitals.

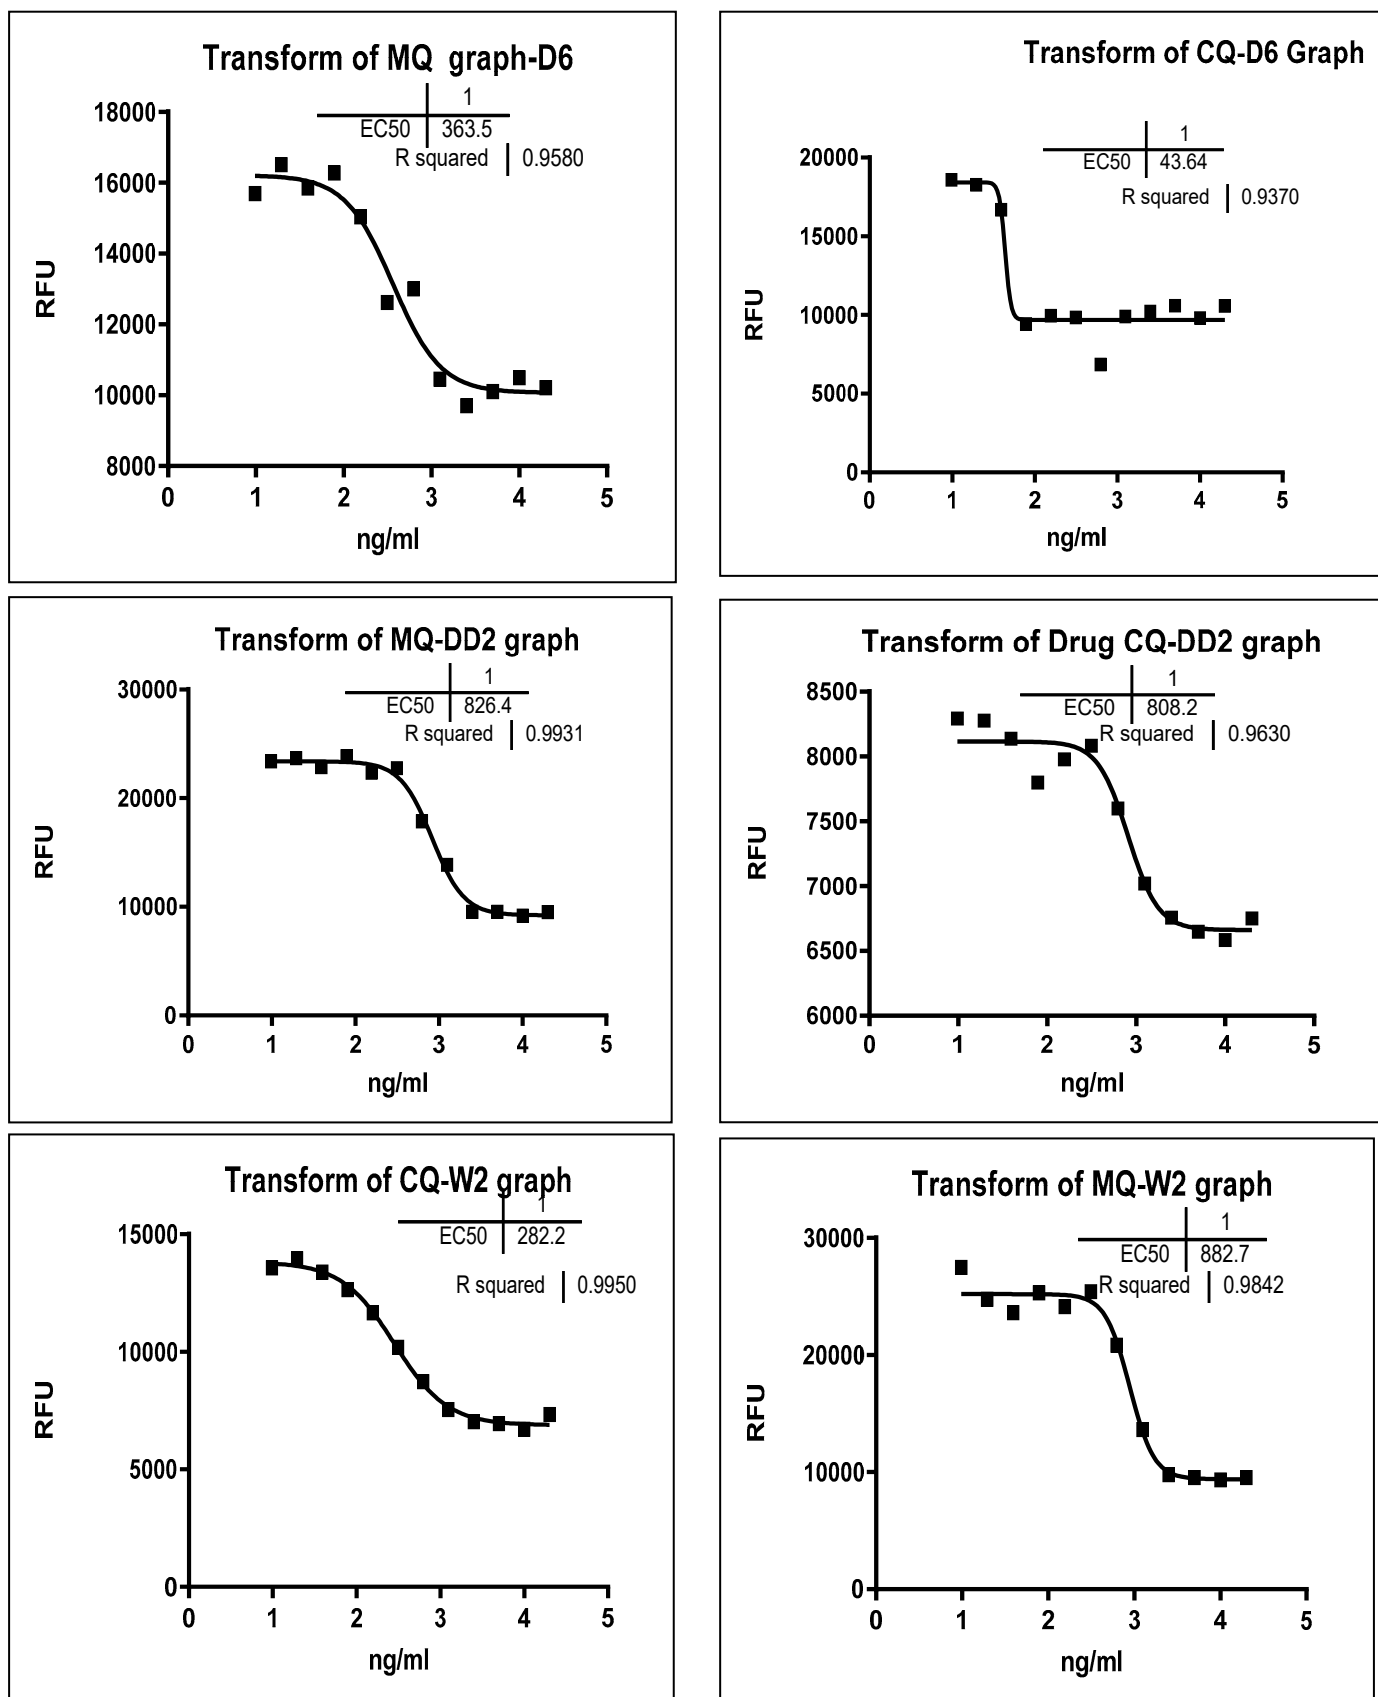

**Figure S3:** Antiplasmodial activity dose response curves of MQ and CQ against *Plasmodium falciparum* strains (D6, W2 and DD2).

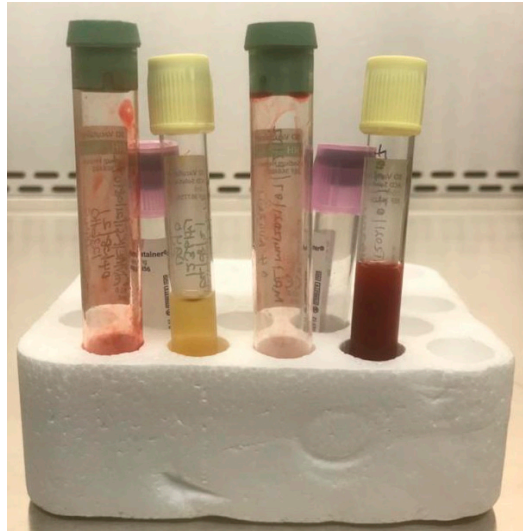

**Figure S4:** Blood samples received from nearby hospitals for immediate *ex vivo* testings.

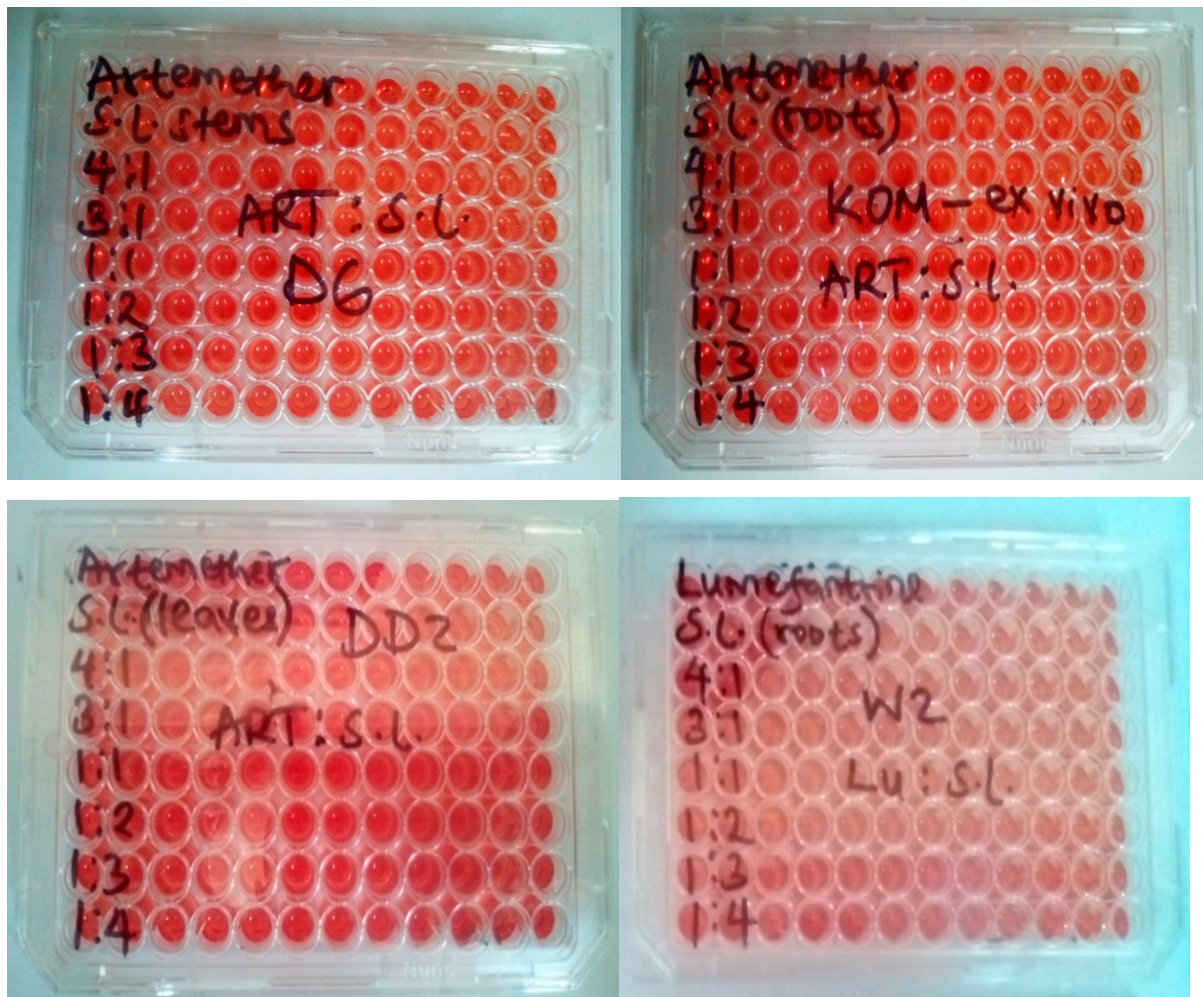

**Figure S5:** Red blood cells, drug-extract combinations, *P. falciparum* strains and test media in 96-well plates.

**SELECTED RELATIVE FREQUENCY UNITS (RFUs) AND SUM 50% FRACTIONAL INHIBITION  
CONCENTRATIONS (FIC<sub>50</sub>s)**

**Table S1:** Relative fluorescence units and sum FIC<sub>50</sub>s for artemether combined with leaves extract against D6 *Plasmodium falciparum* strain.

|                                                                                                    |      |      |      |      |                      |      |      |             |         |          |                                         |          |         |         |           |
|----------------------------------------------------------------------------------------------------|------|------|------|------|----------------------|------|------|-------------|---------|----------|-----------------------------------------|----------|---------|---------|-----------|
| GENios Plus; Serial number: 610000002; Firmware: V 6.03 13_07_2005 Genios; XFLUOR4 Version: V 4.51 |      |      |      |      |                      |      |      |             |         |          | Artemether + leaves extracts against D6 |          |         |         |           |
| Date:                                                                                              |      |      |      |      | 27-12-20             |      |      |             |         |          |                                         |          |         |         |           |
| Time:                                                                                              |      |      |      |      | 09:59                |      |      | Fixed ratio | FIC Art | FIC MeOH | leaves                                  |          | FIC50 A | FIC50 B | SUM FIC50 |
|                                                                                                    |      |      |      |      |                      |      | A    | 42.98       | 0       |          |                                         |          | 1       | 0       |           |
| Measurement mode:                                                                                  |      |      |      |      | Fluorescence Bottom  |      |      | 4:01        | 25.15   | 2106     |                                         |          | 0.58516 | 0.04768 | 0.63284   |
| Excitation wavelength:                                                                             |      |      |      |      | 485                  | nm   |      | 3:01        | 24.15   | 3014     |                                         |          | 0.56189 | 0.06824 | 0.63013   |
| Emission wavelength:                                                                               |      |      |      |      | 535                  | nm   |      | 1:01        | 24.58   | 6144     |                                         |          | 0.57189 | 0.13911 | 0.71101   |
| Gain (Manual):                                                                                     |      |      |      |      | 60                   |      |      | 1:02        | 31.74   | 15870    |                                         |          | 0.73848 | 0.35933 | 1.09781   |
| Number of flashes:                                                                                 |      |      |      |      | 10                   |      |      | 1:03        | 19.92   | 14941    |                                         |          | 0.46347 | 0.33829 | 0.80176   |
| Lag time:                                                                                          |      |      |      |      | 0                    | µs   |      | 1:04        | 21.68   | 21683    |                                         |          | 0.50442 | 0.49094 | 0.99536   |
| Integration time:                                                                                  |      |      |      |      | 40                   | µs   |      | B           | 0       | 44166    |                                         |          | 0       | 1       |           |
| Plate definition file:                                                                             |      |      |      |      | NUN96ft.pdf          |      |      |             |         |          |                                         | SUMFIC50 | 3.42531 | 1.4436  | 4.86891   |
|                                                                                                    |      |      |      |      |                      |      |      |             |         |          |                                         |          |         |         |           |
| Rawdata                                                                                            |      |      |      |      | Temperature: 24.7 °C |      |      |             |         |          |                                         |          |         |         |           |
| <>                                                                                                 | 1    | 2    | 3    | 4    | 5                    | 6    | 7    | 8           | 9       | 10       | 11                                      | 12       |         |         |           |
| A                                                                                                  | 800  | 819  | 951  | 1383 | 1312                 | 1358 | 1305 | 1457        | 1429    | 1428     | 1265                                    | 1573     |         |         |           |
| B                                                                                                  | 1079 | 1187 | 1274 | 1335 | 1299                 | 1338 | 1313 | 1326        | 1346    | 1328     | 1266                                    | 1463     |         |         |           |
| C                                                                                                  | 805  | 818  | 966  | 1150 | 1309                 | 1337 | 1312 | 1364        | 1316    | 1341     | 1301                                    | 1500     |         |         |           |
| D                                                                                                  | 806  | 823  | 992  | 1148 | 1284                 | 1330 | 1297 | 1364        | 1356    | 1380     | 1272                                    | 1445     |         |         |           |
| E                                                                                                  | 859  | 910  | 1069 | 1219 | 1251                 | 1308 | 1330 | 1375        | 1206    | 1314     | 1266                                    | 1432     |         |         |           |
| F                                                                                                  | 891  | 1054 | 1211 | 1305 | 1323                 | 1315 | 1275 | 1326        | 1268    | 1324     | 1254                                    | 1451     |         |         |           |
| G                                                                                                  | 866  | 1000 | 1223 | 1306 | 1308                 | 1263 | 1381 | 1348        | 1299    | 1351     | 1290                                    | 1386     |         |         |           |
| H                                                                                                  | 885  | 1104 | 1275 | 1358 | 1341                 | 1352 | 1327 | 1280        | 1283    | 1275     | 1350                                    | 1509     |         |         |           |

**Table S2:** Relative fluorescence units and sum FIC<sub>50</sub>s for artemether combined with leaves extract against field isolate *ex vivo*.

|                                                                                                    |      |      |      |      |                      |      |          |          |              |                                                |          |          |          |
|----------------------------------------------------------------------------------------------------|------|------|------|------|----------------------|------|----------|----------|--------------|------------------------------------------------|----------|----------|----------|
| GENios Plus; Serial number: 610000002; Firmware: V 6.03 13_07_2005 Genios; XFLUOR4 Version: V 4.51 |      |      |      |      |                      |      |          |          |              |                                                |          |          |          |
| Date:                                                                                              |      |      |      |      | 31-1-21              |      |          |          |              | Artemether +leaves extracts against KDH-01/195 |          |          |          |
| Time:                                                                                              |      |      |      |      | 20:25                |      |          |          |              |                                                |          |          |          |
|                                                                                                    |      |      |      |      |                      |      | Fixed Ra | FIC50 AR | FIC50 Leaves |                                                | FIC50 A  | FIC50 B  | SUM FIC5 |
| Measurement mode:                                                                                  |      |      |      |      | Fluorescence Bottom  |      | A        | 49.36    | 0            |                                                | 1        | 0        |          |
| Excitation wavelength:                                                                             |      |      |      |      | 485 nm               |      | 4:01     | 37.51    | 3109         |                                                | 0.759927 | 0.151799 | 0.911726 |
| Emission wavelength:                                                                               |      |      |      |      | 535 nm               |      | 3:01     | 33.76    | 4188         |                                                | 0.683955 | 0.204482 | 0.888437 |
| Gain (Manual):                                                                                     |      |      |      |      | 60                   |      | 1:01     | 13.12    | 3279         |                                                | 0.265802 | 0.1601   | 0.425902 |
| Number of flashes:                                                                                 |      |      |      |      | 10                   |      | 1:02     | 10.34    | 5173         |                                                | 0.209481 | 0.252576 | 0.462057 |
| Lag time:                                                                                          |      |      |      |      | 0 µs                 |      | 1:03     | 3.543    | 2657         |                                                | 0.071779 | 0.12973  | 0.201509 |
| Integration time:                                                                                  |      |      |      |      | 40 µs                |      | 1:04     | 3.127    | 3127         |                                                | 0.063351 | 0.152678 | 0.216029 |
| Plate definition file:                                                                             |      |      |      |      | NUN96ft.pdf          |      | B        | 0        | 20481        |                                                | 0        | 1        |          |
|                                                                                                    |      |      |      |      |                      |      |          |          |              | SUMFIC5                                        | 2.054295 | 1.051365 | 3.10566  |
| Rawdata                                                                                            |      |      |      |      | Temperature: 26.8 °C |      |          |          |              |                                                |          |          |          |
| <>                                                                                                 | 1    | 2    | 3    | 4    | 5                    | 6    | 7        | 8        | 9            | 10                                             | 11       | 12       |          |
| A                                                                                                  | 5766 | 2416 | 3162 | 3800 | 3586                 | 4477 | 5850     | 5507     | 5418         | 4877                                           | 6828     | 4902     |          |
| B                                                                                                  | 3792 | 4161 | 5418 | 5610 | 5523                 | 6073 | 7349     | 5995     | 6615         | 5018                                           | 6549     | 4807     |          |
| C                                                                                                  | 2166 | 2412 | 3914 | 5762 | 5330                 | 5985 | 4954     | 5909     | 6777         | 5348                                           | 5148     | 4896     |          |
| D                                                                                                  | 2143 | 2153 | 4181 | 6013 | 5757                 | 6348 | 5132     | 5903     | 6408         | 5076                                           | 7087     | 4990     |          |
| E                                                                                                  | 2082 | 2131 | 3313 | 3882 | 5012                 | 6418 | 5990     | 6103     | 6665         | 5973                                           | 5742     | 5162     |          |
| F                                                                                                  | 2089 | 2183 | 3054 | 4269 | 5815                 | 5959 | 5558     | 5835     | 6957         | 5279                                           | 5497     | 5278     |          |
| G                                                                                                  | 2143 | 2199 | 3030 | 2919 | 4474                 | 6280 | 5218     | 5900     | 7858         | 5590                                           | 6193     | 5225     |          |
| H                                                                                                  | 2168 | 2244 | 3459 | 2975 | 4525                 | 5858 | 5268     | 5981     | 6876         | 5647                                           | 5422     | 4787     |          |
