# Supplementary material for: Synergism in Antiplasmodial Activities of Artemether and Lumefantrine in Combination with Securidaca longipedunculata Fresen (Polygalaceae)
Source: Plants (Basel). 2021 Dec 24;11(1):47. doi: 10.3390/plants11010047 (PMC8747340; doi:10.3390/plants11010047)
Supplement: Supplementary file 1 [file plants-11-00047-s001.zip › Table S3-MOLECULAR_DATA_Ochora et al....2021.xlsx]

## Sheet: Table S3 Molecular data
									Table S3: Molecular analysis data
Sample Name		Species					PFMDR1 SNPs					PFCRT SNPs							PFDHFR SNPs				PFDHPS SNPs					PFMRP1 SNPS
		qPCR					Iplex SEQUENOM PLATFORM					Iplex SEQUENOM PLATFORM							Iplex SEQUENOM PLATFORM				Iplex SEQUENOM PLATFORM					Iplex SEQUENOM PLATFORM
ID	Day	Plas	Fal	Mal	Wall	Cur	86_A/T	184_A/T	1034_A/T	1042_A/G	1246_G/T	72_T/A	76_A/C	271_C/G	326_A/G	356_A/T	356_2_T/C	371_G/T	16_C/T	22_G/A	59_T/C	164_A/T	436_C/T	436_2_T/G	437_G/C	581_C/G	613_G/A/T	191_C/T	437_T/G	876_A/G	1390_T/A	268_T/A	268_1_A/G	284_G/A
D6							A	A	A	A	G	T	A	C	A	A	T	G	C	G	T	A	C		C	C	G	C	T	A	T	T	A	G
MAL_KOM_2021_01_0195	0	Pos	Pos	Neg	Neg	Neg	A		A	A	G	T	A	C		A	T	G	C		C	A	C		G	C		C	T	G	T	T		G
MAL_KOM_2021_01_0204	0	Pos	Pos	Pos	Neg	Neg	A	A	A	A	G	T	A	C		A	T	G	C		C	A	C		G	C	G	C	T	A	T	T		G
MAL_KOM_2021_01_0206	0	Pos	Pos	Neg	Neg	Neg	A	A	A				A	C	A	A		G		G	C		C		G	C	G	C		G			A	G
MAL_KOM_2021_01_0208	0	Pos	Pos	Pos	Neg	Neg	A	AT	A	A	G	T	A	C	A	A	T	G	C	G	C	A	C		G	C	G	C	T	A	T	T	A	G
MAL_KOM_2021_01_0209	0	Pos	Pos	Pos	Neg	Pos	A	A	A	A	G	T	A	C	A	A	T	G	C	G	C	A	C	T	G	C	G	C	T	G	T	T	A	G
MAL_KOM_2021_01_0210	0	Pos	Pos	Pos	Neg	Neg	A	T	A	A	G	T	A	C	A	A	T	G	C		C	A	C		G	C	G	C	T	GA	T	T	A	G
MAL_KOM_2021_01_0211	0	Pos	Pos	Neg	Neg	Neg	A	T	A	A	G	T	A	C	A	A	T	G	C	G	C	A	C		G	C	G	C	T	GA	T	T	A	G
								KEY
										Mutations
										Mixed infection
										Wild-type
